# Supplementary material
Source: PubMed Central journal article supplement (PMC3837340)
Supplement: NIHMS74952-supplement-Supplement1.pdf [file NIHMS74952-supplement-Supplement1.pdf]

**Cell, Volume 132**

**Supplemental Data**

**An Extended Transcriptional Network**

**for Pluripotency of Embryonic Stem Cells**

Jonghwan Kim, Jianlin Chu, Xiaohua Shen, Jianlong Wang, and Stuart H. Orkin

### **SUPPLEMENTAL EXPERIMENTAL PROCEDURES**

#### **ES cell lines and culture**

Mouse J1 ES cell lines were maintained in ES medium (DMEM; Dulbecco's modified Eagle's medium) supplemented with 15% fetal calf serum, 0.1 mM  $\beta$ -mercaptoethanol, 2 mM L-glutamine, 0.1 mM non-essential amino acid, 1% of nucleoside mix (100X stock, Sigma), 1000U/ml recombinant leukemia inhibitory factor (LIF; Chemicon) and 50 U/ml Penicillin/Streptomycin. ES cells expressing biotin-tagged Nanog, Dax1, Nac1, Oct4, Zfp281, and Rex1 were described previously (Wang et al., 2006). For biotin-tagged Klf4, Sox2 and c-Myc, cDNAs for each gene were amplified via PCR from an embryonic cDNA library (Clontech) and incorporated into the pEF1 $\alpha$ -FLBIO vector. Each vector was stably transfected into the ES cells stably expressing *Escherichia coli* biotin ligase BirA enzyme under the control of EF1 $\alpha$  promoter. Positive clones were selected by growth in Puromycin and the level of ectopic expression of transcript or protein was detected by quantitative RT-PCR or Western blotting assay with anti-streptavidin-HRP and factor specific antibodies (Wang et al., 2006). List of primers used for PCR validation are available in **Table S4**.

#### **Chromatin immunoprecipitation and antibodies**

For biotin-mediated ChIP, approximately,  $5 \times 10^7$  mES cells expressing both BirA and biotinylated proteins were used. Briefly, cells were cross-linked by addition of final 1% formaldehyde for 7 min at room temperature. Cross-linking was terminated by adding final 125 mM glycine and cells were washed with cold phosphate-buffered saline (PBS) containing PMSF, scraped off the plates, collected by centrifugation and washed again. Collected cell pellet was resuspended in SDS ChIP buffer (0.1% SDS, 1% Triton X-100, 2 mM EDTA, 20 mM Tris-Cl pH 8.1, 150 mM NaCl, and protease inhibitors). Cells were sonicated and fragmented DNA was visualized on an agarose gel (average size 0.5-1 kb). The sample was centrifuged at 12000 rpm at 4°C for 10 min and supernatant

was collected. Sample was pre-cleared with protein A beads at 4°C for 1 hr and incubated with streptavidin beads (Dynabeads® MyOne™ Streptavidin T1) at 4°C overnight. For reference sample, J1 ES cells expressing BirA enzyme without biotinylated protein were used. Immunoprecipitated complexes were successively washed with buffer I (2% SDS), buffer II (0.1% Deoxycholate, 1% Triton X-100, 1 mM EDTA, 50 mM HEPES pH 7.5, 500 mM NaCl), buffer III (250 mM LiCl, 0.5% NP-40, 0.5% Deoxycholate, 1 mM EDTA, 10 mM Tris-Cl pH 8.1) and TE buffer (10 mM Tris-Cl pH 7.5, 1 mM EDTA). All washes were for 8 min at room temperature. SDS elution buffer was added and incubated at 65°C overnight to reverse crosslink protein-DNA complexes. The sample was treated with RNase A and Proteinase K, extracted with phenol:chloroform and precipitated. The pellet was resuspended in 25µl of water.

Conventional ChIP reaction was performed as described previously (Kim et al., 2005) with 1:100 dilution of following antibodies; anti-Nanog (ab21603, Abcam), anti-c-Myc (sc-764x, Santa Cruz), anti-H3K4me3 (ab8580, Abcam) and anti-H3K27me3 (07-449, Upstate). Input genomic DNA was used for the reference sample. For western blotting assays shown in **Figure S2**, anti-Nanog, anti-Sox2, anti-Dax1, anti-Oct4, anti-Klf4, and anti-c-Myc antibodies were purchased from Santa Cruz Biotechnology. Anti-Nac1 was a generous gift from Scott Mackler (University of Pennsylvania School of Medicine).

### **Microarray and data processing**

At least three biological replicates of hybridization were performed on Affymetrix GeneChip Mouse promoter 1.0R arrays. ChIP samples were amplified by ligation-mediated PCR (LM-PCR), as described previously (Ren et al., 2000). Subsequent DNA fragmentation and biotin labeling steps were performed according to the manufacturer's instructions

([http://www.affymetrix.com/support/downloads/manuals/chromatin\\_immun\\_ChIP.pdf](http://www.affymetrix.com/support/downloads/manuals/chromatin_immun_ChIP.pdf)). Microarray hybridization, washing, and scanning were performed at Microarray Core Facility - Dana-Farber Cancer Institute. MAT (Model-based Analysis of Tiling-array) was applied to predict the target loci (Johnson et al., 2006), and targets were predicted at the MAT with p-value=1.00E-6. Genomic regions between 8 kb upstream and 2 kb downstream of transcription start site (TSS) of well annotated genes from mouse genome annotation released in March 2006 (mm8) was used, and for the genes that have multiple transcripts with same TSS presented in RefSeq, we used information from only one transcript the analysis (total 19,253 genes).

For gene expression analysis, we obtained expression data from a previous study (Perez-Iratxeta et al., 2005) where a triplicate time course experiment of *in vitro* differentiation of mES cells was performed (11 time points; day 0, 6 hours, 12 hours, 18 hours, 24 hours, 36 hours, 48 hours, 4 days, 7 days, 9 days, and 14 days). The CEL files were imported into dChIP software (Schadt et al., 2001) for data normalization, extraction of expression values, and generating GTC file for GSEA analysis (Subramanian et al., 2005).

For the supervised clustering image shown in **Figure 4A**, we first performed unsupervised hierarchical clustering across the transcription factors based on their target correlation using Cluster software (**Figure 3E and Figure 4A, cluster**) (Eisen et al., 1998). To get a simple view of common targets of multiple factors and unique targets of single factor, we first randomized the order of 6632 genes, then sequentially sorted targets of each factor from Myc (the factor that has the most different set of targets as shown in Figure 2D hierarchical cluster) to Nanog. For visualization of target gene expression profile in **Figure 4A**, expression values of each gene during ES cell differentiation time course of 0 hours, 6 hours, 12 hours, and 18 hours (EX: 0-18h; red line), and day 4, day 7, day 9, and day 14 (EX: 4-14d; blue line) were averaged based on the similarity of expression profiles before moving window average was applied. Examples of the individual time point data (0 hours, 12 hours, 36 hours, 48 hours, 9 days, and 14 days) are shown in **Figure S8**.

### **Quantitative real-time PCR**

Quantitative PCR was performed with a Bio-Rad iCycler in a 25 $\mu$ l SYBR Green reaction with approximately 2% of ChIP sample. PCR parameters were: 95°C for 3 min and 40 cycles of 95°C 20 sec, 60°C 30 sec, and 68°C 30 sec. The amount of each amplification product was determined relative to a standard curve, and fold enrichment was calculated by comparison of amplified product from bioChIP sample and ChIP samples from BirA containing ES cells. Primer pairs for quantitative ChIP-PCR were designed using  $\pm$ 150bp genomic sequence information specific to the predicted target loci to generate 100bp to 125bp amplified products. All primer sequences used in **Figure 1B** and **Figure S5** are listed in **Table S4**.

### **Visualization of Regulatory Network**

Cytoscape software version 2.3 (Shannon et al., 2003) was used for the visualization of transcription regulatory networks shown in **Figure 6**.

## SUPPLEMENTAL REFERENCES

- Eisen, M.B., Spellman, P.T., Brown, P.O., and Botstein, D. (1998). Cluster analysis and display of genome-wide expression patterns. *Proc Natl Acad Sci U S A* *95*, 14863-14868.
- Johnson, W.E., Li, W., Meyer, C.A., Gottardo, R., Carroll, J.S., Brown, M., and Liu, X.S. (2006). Model-based analysis of tiling-arrays for ChIP-chip. *Proc Natl Acad Sci U S A* *103*, 12457-12462.
- Perez-Iratxeta, C., Palidwor, G., Porter, C.J., Sanche, N.A., Huska, M.R., Suomela, B.P., Muro, E.M., Krzyzanowski, P.M., Hughes, E., Campbell, P.A., *et al.* (2005). Study of stem cell function using microarray experiments. *FEBS Lett* *579*, 1795-1801.
- Ren, B., Robert, F., Wyrick, J.J., Aparicio, O., Jennings, E.G., Simon, I., Zeitlinger, J., Schreiber, J., Hannett, N., Kanin, E., *et al.* (2000). Genome-wide location and function of DNA binding proteins. *Science* *290*, 2306-2309.
- Schadt, E.E., Li, C., Ellis, B., and Wong, W.H. (2001). Feature extraction and normalization algorithms for high-density oligonucleotide gene expression array data. *J Cell Biochem Suppl Suppl* *37*, 120-125.
- Shannon, P., Markiel, A., Ozier, O., Baliga, N.S., Wang, J.T., Ramage, D., Amin, N., Schwikowski, B., and Ideker, T. (2003). Cytoscape: a software environment for integrated models of biomolecular interaction networks. *Genome Res* *13*, 2498-2504.
- Subramanian, A., Tamayo, P., Mootha, V.K., Mukherjee, S., Ebert, B.L., Gillette, M.A., Paulovich, A., Pomeroy, S.L., Golub, T.R., Lander, E.S., *et al.* (2005). Gene set enrichment analysis: a knowledge-based approach for interpreting genome-wide expression profiles. *Proc Natl Acad Sci U S A* *102*, 15545-15550.
- Wang, J., Rao, S., Chu, J., Shen, X., Levasseur, D.N., Theunissen, T.W., and Orkin, S.H. (2006). A protein interaction network for pluripotency of embryonic stem cells. *Nature* *444*, 364-368.

## SUPPLEMENTAL FIGURES

### Figure S1. Comparison of bioChIP-chip and antibody ChIP-chip

Global patterns of Nanog and Myc binding to the target promoters of genes on chromosome 8 are displayed using Affymetrix Integrated Genome Browser and screen captured. 'bioNanog', and 'bioMyc' represent the data from bioChIP-chip. 'Nanog antibody', and 'Myc antibody' represent the data from antibody ChIP-chip.

Figure S1

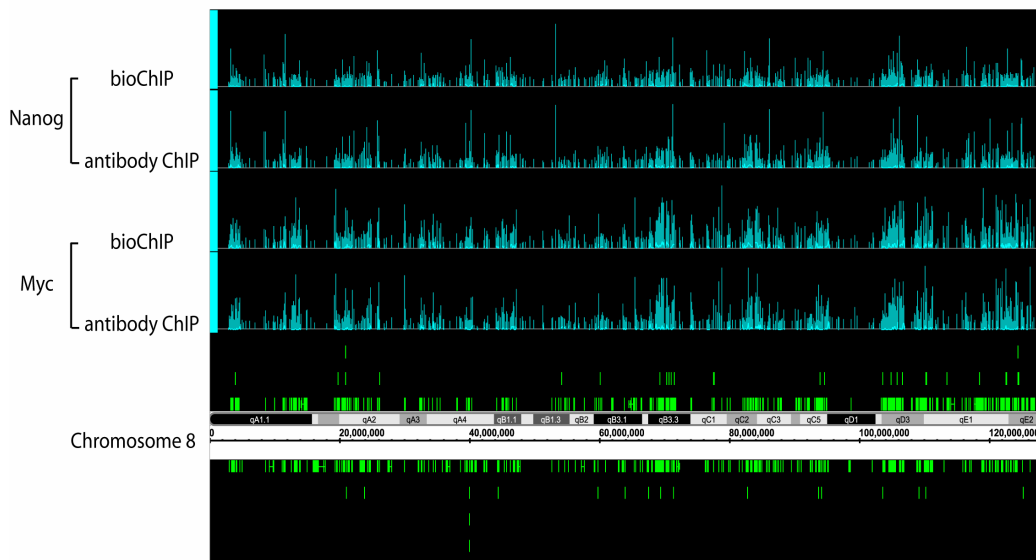

**Figure S2.** Sub-endogeneous expression of biotin tagged proteins in biotin-tagged cell lines

Nuclear extracts from ES cells expressing each biotin-tagged protein were subjected to Western blot analyses using the indicated antibodies. Both the biotin-tagged and endogenous levels of the protein are shown from bioTF cells but BirA expressing cells express only endogeneous proteins. n.s indicates non-specific.

Figure S2

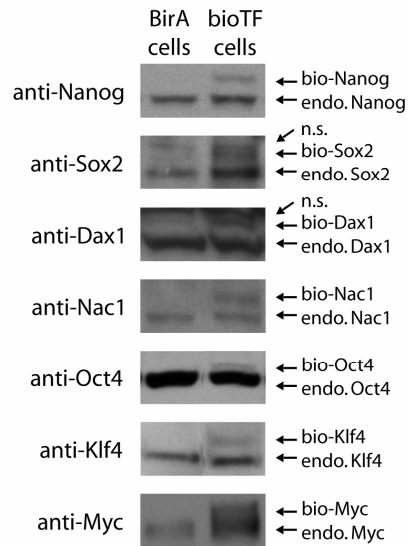

**Figure S3.** Correlation of Nanog occupancy among different cell lines based on target peak similarity shown in **Figure 2**.

Figure S3

|                              |          | bioNanog | J1ES  | BirA  | bioNanog | bioOct4 | bioDax1 |
|------------------------------|----------|----------|-------|-------|----------|---------|---------|
| bioChIP/BirA                 | bioNanog | 1.000    |       |       |          |         |         |
| Nanog antibody<br>ChIP/input | J1ES     | 0.896    | 1.000 |       |          |         |         |
|                              | BirA     | 0.883    | 0.984 | 1.000 |          |         |         |
|                              | bioNanog | 0.895    | 0.985 | 0.970 | 1.000    |         |         |
|                              | bioOct4  | 0.886    | 0.964 | 0.967 | 0.962    | 1.000   |         |
|                              | bioDax1  | 0.883    | 0.967 | 0.973 | 0.963    | 0.968   | 1.000   |

**Figure S4.** Representative examples of target promoter occupancy by each factor  
 Multiple factors bind to their common target promoters in close proximity (Sox2 and Evx1). Some targets are co-occupied by fewer factors (Fgfr2 and Cdx4). Examples of Rex1 and Myc common targets are also shown (Crat/Ppp2r4 and Anp32b).

Figure S4

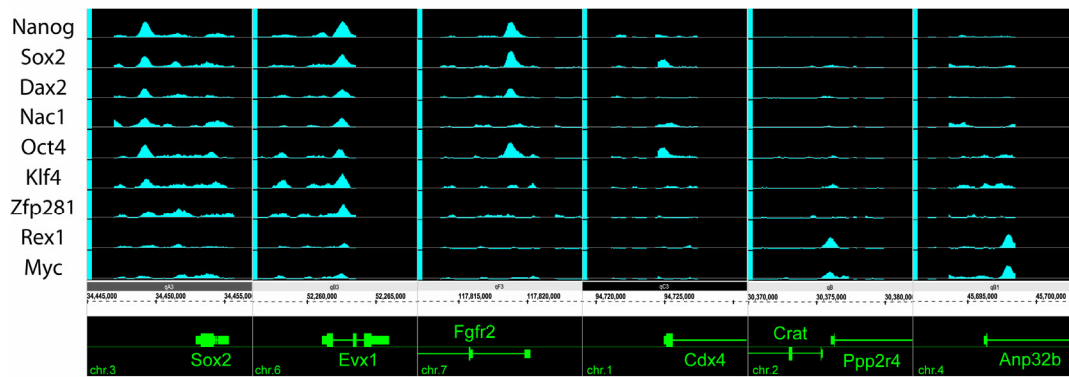





**Figure S6.** Functional classification of targets of each factor

Percent of gene hit against total number of function hits for targets of each transcription factor was calculated from PANTHER ([www.pantherdb.org](http://www.pantherdb.org)). The obtained percent value was divided by the value calculated for all mouse genes, and multiplied by 100. Values above 100 indicate enrichment and values below 100 indicate depletion for each GO term. Targets of Myc or Rex1 are implicated in protein metabolism, whereas targets of the other factors are in developmental processes.

Figure S6

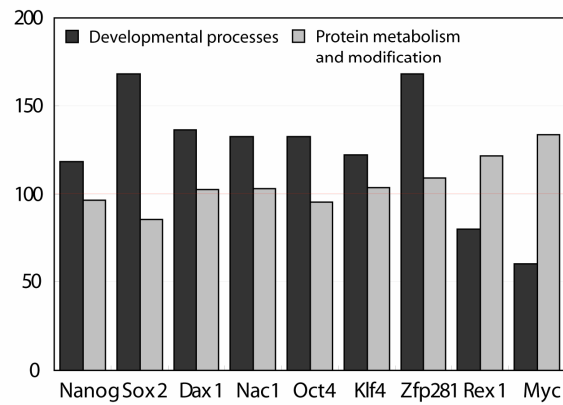

**Figure S7.** Cluster of genes not occupied by any of nine transcription factors  
(A) Schematic representation of whole genome distribution of H3K4me3, H3K27me3, and nine factors. X-axis represents all RefSeq genes based on their chromosomal positions. Predicted histone marks H3K4me3 (red), H3K27me3 (blue) and transcription factor binding (green) on the promoters of each gene were initially assigned 1 (presence) or 0 (absence). Moving window average (bin size 100 and step size 1) was applied across the genes. Red dots represent some clusters of genes devoid of any of the nine transcription factor occupancy, H3K4me3 and H3K27me3 marks on their promoters.  
(B) Enlarged view of chromosome 2 containing a cluster of olfactory receptor genes.

Figure S7

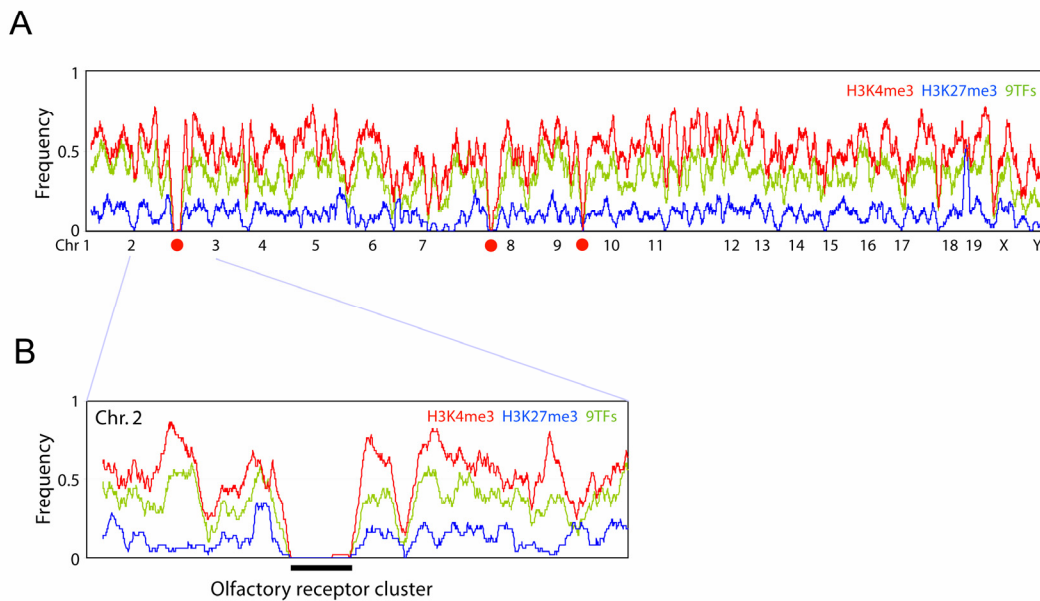

**Figure S8.** Transcription factor occupancy to the target promoter and corresponding gene expression during differentiation time course

Extension of analysis shown in **Figure 4A**. Instead of averaging multiple time points, 6 different time points are presented in three different columns showing overall expression profiles between earlier time points (0h and 12h) or later time points (9d and 14d) are similar.

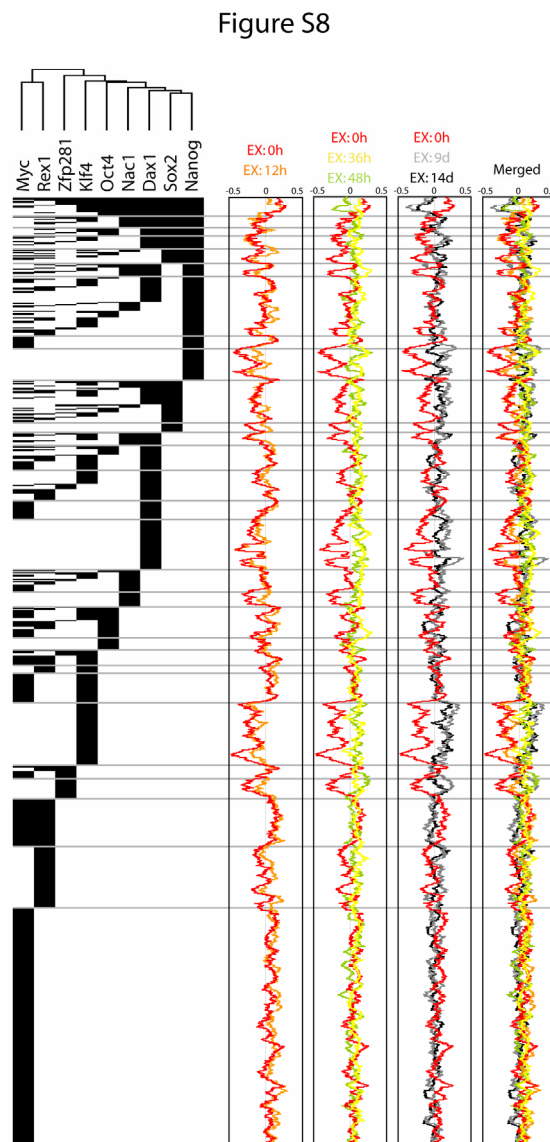

**Figure S9.** Target gene expression and transcription factor occupancy  
Extension of analysis shown in **Figure 4**. Target promoters were classified based on the number of co-occupying factors onto the promoters and corresponding gene expression upon differentiation was tested using GSEA software.

Figure S9

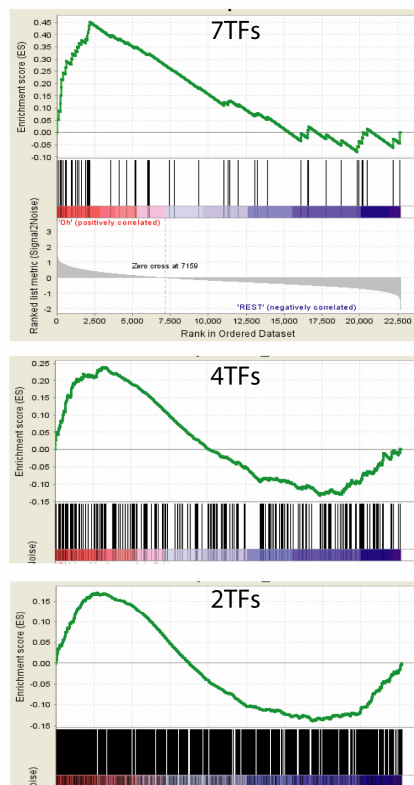

**Figure S10.** Single factor only targets are inactivated or repressed in ES cells  
Extension of analysis shown in **Figure 4F and 4G**. Targets of eight factors were tested in two different ways using GSEA software. Figures shown on the left column represent all the targets of each factor and their gene expression upon ES cell differentiation. For figures shown on the right column (depicted as factor-‘only’) the subset of targets predicted to be occupied by only one factor were used.

Figure S10

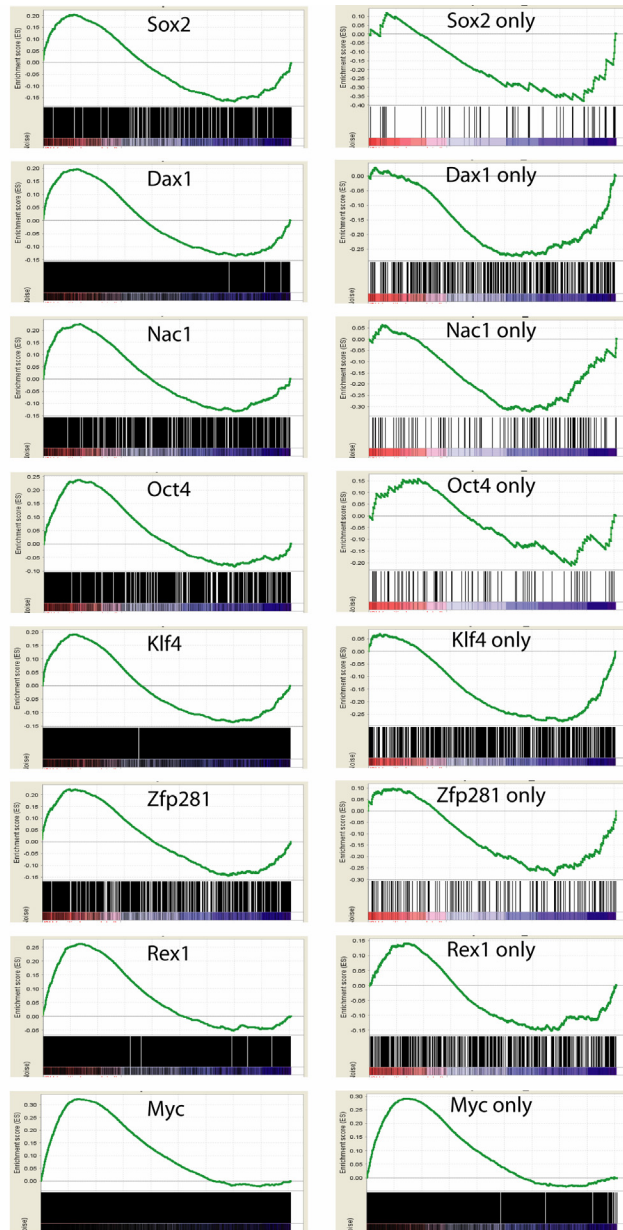

## SUPPLEMENTAL TABLE

**Table S4.** Primer sequences for RT-PCR and ChIP-PCR

| PrimerName   | Gene    | Approximate distance from TSS | Forward sequence        | Reverse sequence          | Application |
|--------------|---------|-------------------------------|-------------------------|---------------------------|-------------|
| Arnt_core    | Arnt    | core                          | CTAATCTCGGAGTGGCTCTT    | CCTCACCTGGGTAGCTGTAGT     | ChIP-PCR    |
| Cbx1_up2     | Cbx1    | upstream 2kb                  | GCACCCTGAATTCCTTTCTTAT  | AATCGTAACTCCAGGACATCTGA   | ChIP-PCR    |
| Cbx7_up2     | Cbx7    | upstream 2kb                  | TTATTTAGAAGGGCTTCCTTTG  | GGGTGTTTGTAAAGGAGGGATAG   | ChIP-PCR    |
| Dax1_core    | Dax1    | core                          | GTTAATGGCAAGATTGGAACAG  | ACCACATACCACCTTTCTCTT     | ChIP-PCR    |
| Dido1_dn0.8  | Dido1   | downstream 0.8kb              | GGAAGTTGAGGCTCTTTAACAC  | AATGACTGAATTTGCATTACCT    | ChIP-PCR    |
| Dst_up5      | Dst     | upstream 5kb                  | CTGTTTGACTCTGCTTCTGGTT  | AGGTTGCCTTGATGGTTAGTGTA   | ChIP-PCR    |
| E2f3_core    | E2f3    | core                          | GCGGAGATATGCAAATATGGTT  | CTGCTGCTGACAATGAATGAAG    | ChIP-PCR    |
| Ewsr1_core   | Ewsr1   | core                          | TTCAGAGACGGTCCCTAGAGC   | GACGTGACGAGTGGTCTAAAAA    | ChIP-PCR    |
| Gfi1b_core   | Gfi1b   | core                          | CGCCAGATTTTGACACAATAA   | CTGCACAGACAGACACTTCTCC    | ChIP-PCR    |
| Hoxb13_up1   | Hoxb13  | upstream 1kb                  | CTTAACTTCAACTGGCCTTGA   | GGAGGAGTCTGTAGCCTTAGAGC   | ChIP-PCR    |
| Il6st_up1.5  | Il6st   | upstream 1.5kb                | ATGGGAAGTAACAACCGTAGGAT | AAGACTTGTAAGGGCCTTTGTTC   | ChIP-PCR    |
| Jarid1b_up4  | Jarid1b | upstream 4kb                  | CACCGAGTGAGACGACTAGATTC | AAATATTTGTAGAAAGGGCCTTGA  | ChIP-PCR    |
| Kdelc1_core  | Kdelc1  | core                          | CAGGATTTCCGCTAGTCTATG   | GTCTTCTGCTAGTGGATGAGTGG   | ChIP-PCR    |
| Kit_dn2      | Kit     | downstream 2kb                | ATTTAAATTGGGAGTGGGTGTGT | TGCTTTCTGAAATTGTGAECTCC   | ChIP-PCR    |
| Klf2_up2.5   | Klf2    | upstream 12.5kb               | ACTTCAGCTCACTCCCCTACT   | AATAGATCAGTAGCTCAGAGCCAGA | ChIP-PCR    |
| Klf4_dn1.9   | Klf4    | downstream 1.9kb              | CTCCTCTACAGCCGAGAATCTG  | AGGAGCTCAGCCACGAAG        | ChIP-PCR    |
| Klf9_up7.6   | Klf9    | upstream 7.6kb                | TTAAATGCCCTTGTTGTTCTG   | CCCATTTTAAAAACCACTCTTC    | ChIP-PCR    |
| Lefty1_up1   | Lefty1  | upstream 1kb                  | AGCTGCTCTTCTGCATAACAAA  | AGACAATCTTAGTCGGGGATAG    | ChIP-PCR    |
| Lefty2_up4   | Lefty2  | upstream 2kb                  | CAAGTGTGTTGATTTTCCACAG  | CAGACTTCTTTGAGGTTGCAGAG   | ChIP-PCR    |
| Lrrm2_up1    | Lrrm2   | upstream 1kb                  | ATTAAGGGGCCAACTCTGTCTAT | GGCTTCTGGGTTCTGTTATTCT    | ChIP-PCR    |
| Mcm5_core    | Mcm5    | core                          | GCATTTTCTACAGCGACAGCTT  | CACTCGTACTGTCTCAGGAACT    | ChIP-PCR    |
| Mrpl2_core   | Mrpl2   | core                          | ATTGTTTTGACGGCTCCAAG    | CTTGCTCTCCAAGAACAAGT      | ChIP-PCR    |
| Mrps18a_core | Mrps18a | core                          | CGAAAGTCAAGGAGAACTGAGAG | GGGAGAATTAACACTCAGCCTTT   | ChIP-PCR    |
| Mybl2_up2    | Mybl2   | upstream 2kb                  | AAGGAATAGCCTTGATTGGAAG  | CTCAGAACGGATAACAGAATTGC   | ChIP-PCR    |
| Myc_dn0.8    | Mycd    | downstream 0.8kb              | ACAGTCTTCTTCCATTCCTGTG  | TGTCATCTTGACAAGTCGCTCTA   | ChIP-PCR    |
| Nanog_up0.2  | Nanog   | core                          | TGGGGTAAACTTAAGGCTATGG  | AGCTCTAAGCCGGTTCTCATT     | ChIP-PCR    |
| Nanog_up4.7  | Nanog   | upstream 4.7kb                | AATGAGGTAAAGCCTCTTTTGG  | ACCATGGACATTGTAATGCAAA    | ChIP-PCR    |
| Nid2_up1     | Nid2    | upstream 1kb                  | CCCCATGGGTCTTTAAGAATTAC | GGCTCCTTAGAAGCAAAGGTAGT   | ChIP-PCR    |
| Nkx2-2_up3   | Nkx2-2  | upstream 3kb                  | AAGGGTGACGAACAGAACTCTC  | GACTAGGAGGGCAAGAGAACTC    | ChIP-PCR    |

|               |         |                  |                          |                          |          |
|---------------|---------|------------------|--------------------------|--------------------------|----------|
| Nodal_up2     | Nodal   | upstream 2kb     | TGGGGACACATCCTACTAGGTAA  | TCAGAAGTGAATTTGGAGAGAG   | ChIP-PCR |
| Phc1_up4      | Phc1    | upstream 4kb     | AGTTGGGAAATAAGGACATAA    | GGGCTTCTATAGGAAACTCAACA  | ChIP-PCR |
| Rest_up5.6    | Rest    | upstream 5.6kb   | GTCACACTGAGGAAATGAAGGAC  | CCCAGTCTCTGAAACAGAAAAGA  | ChIP-PCR |
| Rex1_core     | Rex1    | core             | GCATCCTCTGCTTGTAATTC     | CTCAGTTATGCAAATGCCTCTTC  | ChIP-PCR |
| Rhof_up2.7    | Rhof    | upstream 2.7kb   | GAGGGAAAGTTGAACAAAACCT   | ACCTAGGGTCCTAACCTGCTACT  | ChIP-PCR |
| Rif1_up0.7    | Rif1    | upstream 0.7kb   | CGTTGTTTAAGGGTTTACTGTGCG | TGCCTAGAATTGGTTTACTCCA   | ChIP-PCR |
| Rpl15_core    | Rpl15   | core             | AGAAAGCCTTCTCCTTTCTCTCT  | GGTCGGATGGCTGAAGACTA     | ChIP-PCR |
| Rpl24_core    | Rpl24   | core             | GAGGGAATATGGATGGTGTGTA   | AAACTCAAAGAAATCTGGCTCTG  | ChIP-PCR |
| Rpl3_core     | Rpl3    | core             | TGGGTGTATTTTTCAGGGTTTTA  | GTTCTCATCCTGCAAGGGTAAAT  | ChIP-PCR |
| Rpl39_core    | Rpl39   | core             | ATCAGCGTAATCCTAAGGGACTT  | AACCAATGCATTCTAAAGACCT   | ChIP-PCR |
| Rps17_dn1.5   | Rps17   | downstream 1.5kb | GCTTTCCTCCCTGGTTATTTCTA  | GCCTATCCCACCTTCTCATACTT  | ChIP-PCR |
| Rybp_dn1.6    | Rybp    | downstream 1.6kb | GCAATTGGAGATATGTCTGGAG   | CAACAATTCACACACTTCACCAT  | ChIP-PCR |
| Sall1_up4.2   | Sall1   | upstream 4.2kb   | CCCAAGCCCTAAGTCTAGAAAAG  | TTAACCACTGGGGTTTATTTGT   | ChIP-PCR |
| Sall4_up2.3   | Sall4   | upstream 2.3kb   | CTGCTCAAGGCATTGTAAGCTAT  | AGACAGAAGTGAAGAAGCCCTT   | ChIP-PCR |
| Set_core      | Set     | core             | GAGGCAACAGCAGTATTAAGTC   | AGAAACCCTGCCTTACACTGAG   | ChIP-PCR |
| Slc20a1_up0.8 | Slc20a1 | upstream 0.8kb   | TGTGCTTACACACAATCCAAC    | CTTGAAACAAACCCTAGGTCTCCT | ChIP-PCR |
| Slo4c1_dn1    | Slo4c1  | downstream 1kb   | CTCCTTTGGAAAACGATAAGTC   | GCCTTAACTCCTCCTCTGTAAA   | ChIP-PCR |
| Sox13_up5     | Sox13   | upstream 5kb     | TTTTGTCTGAAGTTCCTGAGAGG  | GCTGAGGGCAACAATTACATAAC  | ChIP-PCR |
| Sox2_up3.7    | Sox2    | upstream 3.7kb   | GCAATGCTGAGAAATCCAGTT    | GTTCCCTCCTCTCCTAATCTC    | ChIP-PCR |
| SSbp3_up1     | SSbp3   | upstream 1kb     | AGACAGTGCCGACAATGTTTTAT  | TCCAAATCAAAAACCTGGTGAGAT | ChIP-PCR |
| Surf1/2_core  | Surf1/2 | core             | CAAGAAGTACCAACGGCTGTC    | GCCAAACTACGTACCGATTCTTT  | ChIP-PCR |
| Tbx3_up5      | Tbx3    | upstream 5kb     | GACCATTGTCTAGCTCAATCACC  | TCCTGTAAGGCATTTCTTCTCTG  | ChIP-PCR |
| Tcl1_core     | Tcl1    | core             | AGGACAGACTGAAGTGACAGAG   | TCAGTACTTTGTGTACTGCTC    | ChIP-PCR |
| Tcl1_up2      | Tcl1    | upstream 2kb     | CCCCTTTGTGGAATTTACATTTT  | TTCTTGAGAGGTGGTGTTCATT   | ChIP-PCR |
| Tdgf1_up2     | Tdgf1   | upstream 2kb     | AGTGTGGACAAGTCTGAGAGAG   | TGGTAAATAACTGAGCCCTGAAA  | ChIP-PCR |
| Trim8_dn1.8   | Trim8   | downstream 1.8kb | CCCTCCCATTGTATACCCCTAC   | AAGTATGCCCCACTCCAGTTC    | ChIP-PCR |
| Trim8_up5     | Trim8   | upstream 5kb     | CTGCCTCTAGCAACAGAGCTTA   | TTTACTACTTTGCCACCCTTCTG  | ChIP-PCR |
| Zfp148_up1    | Zfp148  | upstream 1kb     | CTCTCAGGAAGTCCCAATAACC   | AGGGAGGGCTTACAGTTAATGAC  | ChIP-PCR |
| Zfp259_core   | Zfp259  | core             | ACTGTTACCGGAACGTGAGTCT   | GGGAGAATGACTTCAGCTTGT    | ChIP-PCR |
| Zfp277_core   | Zfp277  | core             | CCTTCTACTGTGCCAGGTAATG   | CTCACCTTCATGATCTGTGTGTC  | ChIP-PCR |
| Zfp428_up1.5  | Zfp428  | upstream 1.5kb   | CATTTATTGAGACCAGTGCTGTG  | GAGCTCACTCTCTCTGGTATTG   | ChIP-PCR |
| Zfp704_up1.2  | Zfp704  | upstream 1.2kb   | TCCAGTTAACAAGTTTGCTCAT   | TTCAGATACCACCCAGAAATTTA  | ChIP-PCR |
| Zfp764_core   | Zfp764  | core             | TAGGGAGCATAGTTCTGAGATG   | GGGCACCTTAATGTAGTGAAA    | ChIP-PCR |
| Zic5_up2.5    | Zic5    | upstream 2.5kb   | TGTCCTTAGAAAGTCGGGATTTA  | TTTTGTAGACGCCCTTTTTGTTA  | ChIP-PCR |
| Dax1          | Dax1    | n/a              | CAGCATCTTATACAGTTGCTCA   | CCACACTCTGGGTACAGTAGGAC  | RT-PCR   |



|        |        |     |                          |                          |        |
|--------|--------|-----|--------------------------|--------------------------|--------|
| Klf4   | Klf4   | n/a | GTGCAGCTTGCAGCAGTAAC     | AGCGAGTTGGAAAGGATAAAGTC  | RT-PCR |
| Myc    | Myc    | n/a | ACTACGACTCCGTACAGCCCTAT  | TTTCTCCAGATATCCTCACTGG   | RT-PCR |
| Nac1   | Nac1   | n/a | TGAAGAGGACGAAGAAGAAGATG  | CTGGCCAACGTTCAACATACT    | RT-PCR |
| Nanog  | Nanog  | n/a | AGGGTCTGCTACTGAGATGCTCTG | CAACCACTGGTTTTTCTGCCACCG | RT-PCR |
| Pou5f1 | Pou5f1 | n/a | CTGAGGGCCAGGCAGGAGCACGAG | CTGTAGGGAGGGCTTCGGGCACTT | RT-PCR |
| Rex1   | Rex1   | n/a | CAGTCCAGAATACCAGAGTGGA   | ACTCTAGGTATCCGTCAGGGAAG  | RT-PCR |
| Sox2   | Sox2   | n/a | GCGGAGTGGAACCTTTTGTC     | TATTATAATCCGGGTGCTCCTT   | RT-PCR |
| Zfp281 | Zfp281 | n/a | CCCCAGAGTATGTTATGTTCAA   | GTAGAGGAGGATAACACGCACTG  | RT-PCR |
